# Supplementary material
Source: Research Square preprint supplement (doi:10.21203/rs.3.rs-9787060/v1)
Supplement: Supplementary file 1 [file 6a88057ac76f827046cb3a33.docx]

**Effects of different** **beverages on glycemic control in patients with type 2 diabetes: a systematic review and meta-analysis of randomized controlled trials**

Table1.Characteristics of Included Studies

| **Author (country, year of publication)** | **Study design** | **Sample size** | **Age (years; mean (SD)* or median (IQR))** | **Aim of the study** | **Exposure identification** | **Quantity of beverages/ day** | **Outputs of the study** | **Follow-up period** |
| --- | --- | --- | --- | --- | --- | --- | --- | --- |
| R. Marfella  (Italy, 2006) | RCT | 115 | Intervention  36.5 ± 4.6  Control  35.1 ± 5.1 | To examine the effects of moderate red wine intake on echocardiographic parameters of cardiac function, inflammatory cytokines, and oxidative stress in diabetic subjects after their first uncomplicated Myocardial Infarction (MI). | Red wine (Castel San Lorenzo DOC, Barbera, 2000; polyphenol content: 1792 mg/L); the intervention group received the Mediterranean diet + red wine; the control group received the Mediterranean diet without red wine or alcohol | One 118-mL (4-oz) glass/day (11.0 g alcohol) | Nitrotyrosine, CRP, TNF-α, IL-6, IL-18, myocardial performance index, ejection fraction, E/A ratio, pulmonary venous flow, HbA1c, fasting glucose, lipids | 12 months |
| Anne E. Bantle (USA, 2008) | RCT | 17 | 64 years  (45-82 years) | To test whether alcohol in form of wine raises plasma HDL cholesterol or has other beneficial metabolic effects in type 2 diabetes. | Wine (selection of white and red wines provided to subjects; specific type/brand not specified) | Acute phase: 240 mL (24 g alcohol) with evening meal; Chronic phase: 120–240 mL/day (mean 18 g alcohol/day) | Acute phase: plasma glucose, serum insulin (measured q2h x8); Chronic phase: fasting cholesterol, HDL, LDL, triglycerides, glucose, insulin, HbA1c, C-reactive protein, plasminogen, blood pressure, weight, episodes of hypoglycemia | Acute: 2 days; Chronic: 30 days (each period) |
| Iris Shai (Israel, 2007) | RCT | 91 | 41–74 years (range) | To assess the effect of daily moderate alcohol intake on glycemic control (fasting and postprandial) in type 2 diabetes patients who previously abstained from alcohol | Wine (dry red Merlot or white Sauvignon Blanc; 13% alcohol, 13 g alcohol per 150 ml); control: nonalcoholic diet malt beer (150 ml) | 150 ml wine/day (13 g alcohol) with dinner | Fasting plasma glucose, 2-h postprandial glucose, A1C, adverse effects (bilirubin, alkaline phosphatase, ALT, AST), sleep quality | 3 months (12 weeks) |
| Raffaele Napoli (Italy, 2005) | Controlled trial (non-randomized; wine-treated vs. control diabetics) | 17 | Red wine group: 58 ± 2.0 (SE); Control group: 53 ± 3.7 (SE) | To determine whether red wine consumption improves insulin resistance in type 2 diabetic patients and to explore the relation between insulin sensitivity and endothelial function. | Red wine (Chianti Riserva, Marchese Antinori, Italy); the wine-treated group consumed wine daily; the control group consumed no wine/alcohol | 360 mL/day (180 mL at lunch + 180 mL at dinner) | Forearm blood flow (basal and during Ach, sodium nitroprusside, L-NMMA), forearm nitrite balance, whole body glucose disposal (M value), fasting glucose, ractopamines, plasma insulin, FFA, body weight | 2 weeks |
| Fadia Mahmoud (Kuwait, 2016) | RCT | 30 | High Intake group (HI): 52.3 (range 49–57);  Low Intake group (LI): 54.2 (range 51–56) | To evaluate effects of black tea intake on inflammatory cytokines and metabolic biomarkers in type 2 diabetes mellitus | Black tea (Red Label Black Tea, Unilever; 2.5g tea bag infused in 200mL boiling water for 3 min); standardized preparation | HI: 3 cups/day (600 mL); LI: 1 cup/day (200 mL) | HbA1c, fasting blood glucose (FBS), total cholesterol, HDL, LDL, triglycerides, amylase, BMI, regulatory T cells (CD3+CD4+CD25+FOXP3+, CD3+CD4+IL-10+), Th17 cells (CD3+CD4+IL-17+), Th1 cells (CD3+CD4+IFN-Υ+), Th2 cells (CD3+CD4+IL-4+), Treg/Th17 ratio, Treg/Th1 ratio | 12 weeks |
| Tirang R. Neyestani (Iran, 2010) | RCT | 46 | Test: 57.0±7.9; Control: 55.4±8.3 | To evaluate possible effects of different daily doses of black tea intake on oxidative stress, inflammatory and metabolic biomarkers in type 2 diabetes mellitus | Black tea extract (Nooshineh Chaay brand, Lahijan, Iran; 2.5g dry tea infused in 150mL hot water for 2 min) | Test group: 150 mL (week1), 300 mL (wk2), 450 mL (wk3), 600 mL (wk4); Control group: 150 mL/day (throughout) | Serum TAC, MDA, GSH, SOD, CRP, fibrinogen, FBG, HbA1c, insulin, HOMA-IR, triglycerides, total cholesterol, HDL, LDL, BMI, waist/hip circumference, FM, RMR | 4 weeks |
| M. Rafraf (Iran, 2014) | Single-blind randomized controlled clinical trial | 64 | 30–60 (range) | To assess effects of chamomile tea consumption on glycemic control and serum lipid profile in type 2 diabetes mellitus | Chamomile tea (3g tea bag infused in 150mL hot water for 10 min); control: warm water (150mL) | 3 cups/day (450 mL) (one cup immediately after each meal: breakfast, lunch, dinner) | HbA1c, serum glucose, serum insulin, HOMA-IR, total cholesterol, triglycerides, LDL cholesterol, HDL cholesterol, weight, BMI, dietary intake (energy, macronutrients) | 8 weeks |
| O.H. Ryu  (South Korea, 2005) | Randomized crossover trial (tea-first vs. water-first) | 55 | 53.9 ± 7.7 | To examine the effects of green tea consumption on inflammation, insulin resistance, adiponectin, and arterial stiffness (baPWV) in type 2 diabetes patients | Green tea (9g green tea in 900mL water; prepared daily); control: water (900mL) | 900 mL green tea/day (9g green tea) | Total cholesterol, HDL cholesterol, LDL cholesterol, triglycerides, fasting blood glucose, IL-6, hsCRP, adiponectin, fasting insulin, HOMA-IR, right brachial-ankle Pulse Wave Velocity (PWV), left brachial-ankle PWV | 4 weeks per period (crossover design) |
| Gohar Sedaghat  (Iran, 2021) | Randomized controlled trial | 40 | Pre-meal Water group (PW): 52±9.2;  Non-Pre-meal Water group (NPW): 51±8.2 | To investigate effects of pre-meal water intake on serum copeptin levels, glycemic control, lipid profile and anthropometric indices in type 2 diabetes mellitus | Pre-meal water (250 mL 30 min before breakfast, 500 mL 30 min before lunch, 250 mL 30 min before dinner); control: no water consumption before meals | 1 L/day (1000 mL) divided as: 250 mL (breakfast) + 500 mL (lunch) + 250 mL (dinner) | Weight, BMI, waist circumference, WHR, FBS, HbA1c, insulin, HOMA-IR, total cholesterol, triglycerides, HDL-C, LDL-C, copeptin, dietary intake (energy and nutrients via 24-h recall) | 8 weeks |
| Sapna Sehgal  (India, 2026) | Randomized controlled trial | 75 | 30–60 (range) | To evaluate efficacy of Prakriti-specific herbal tea in diabetes mellitus (Prameha) | Prakriti-specific herbal tea (Vata/Kapha/Pitta formula based on individual Prakriti; 6g tea powder in 80-100mL water, roll boiled); Control: lukewarm water (40-50°C) | 80-100 mL twice daily (morning and evening) | FPG, PPG, HbA1c, urine fasting glucose, total cholesterol, triglycerides, CBC | 3 months |
| Tomonori Nagao  (Japan, 2009) | Double-blind, randomized, parallel-group controlled trial | 43 | Catechin: 64.9±1.6 (SE); Control: 62.8±2.2 (SE) | To investigate effects of continuous ingestion of catechin-rich beverage on obesity and blood glucose control in type 2 diabetes patients not receiving insulin therapy | Green tea beverage containing catechins (catechin-rich vs. control); catechin content: 582.8 mg/340mL can (catechin group) vs. 96.3 mg/340mL can (control); caffeine content similar (~72-75 mg/340mL) | 1 can (340 mL) per day | Waist circumference, hip circumference, WHR, body weight, BMI, % body fat, SBP, DBP, glucose, HbA1c, insulin, HOMA-IR, triglycerides, total cholesterol, free fatty acids, total ketone bodies, remnant-like lipoprotein cholesterol, adiponectin, liver function tests, renal function, electrolytes, blood cell counts, dietary intake, physical activity | 12 weeks ingestion + 4 weeks follow-up (total 20 weeks) |
| Mirzaei K  (Iran, 2009) | Double-blind, placebo-controlled randomized trial | 72 | 54.56 ± 11.23 | To investigate the effect of green tea extract (GTE) on bone turnover markers in type 2 diabetes mellitus | Green tea extract (Camellia sinensis leaves from Lahijan, Iran; 500 mg/capsule containing 50 mg caffeine, 80 mg polyphenols); placebo: microcrystalline cellulose | 500 mg GTE three times/day (total 1500 mg/day) after main meals | Fasting blood glucose (FBG), oral glucose tolerance test (G2h), HbA1c, lipid profile, osteocalcin (bone formation), crosslaps (bone resorption), fasting insulin, BMI, waist-to-hip ratio (WHR) | 8 weeks |
| Ameneh Madjd  (Iran/UK, 2016) | Randomized, single-blind clinical trial | 81 | Water: 34.15±6.99;  Diet beverages (DBs): 35.45±7.45 | To compare effect of replacing diet beverages (DBs) with water vs. continuing DBs during a 24-week weight loss program in type 2 diabetic obese women | Diet beverages (DBs; 250 mL, 5 times/week after lunch); Water (250 mL as replacement for DBs post-lunch, 5 times/week) | 250 mL after lunch, 5 times/week (water or diet beverages) | Body weight, BMI, waist circumference, fasting plasma glucose (FPG), 2-hour postprandial glucose (2hppG), HbA1c, fasting insulin, HOMA-IR, total cholesterol, HDL-C, LDL-C, triglycerides | 24 weeks (assessments at 12 and 24 weeks) |
| Zeinab Yazdanpanah  (Iran, 2017) | Randomized controlled clinical trial (parallel-group) | 110 | Intervention: 48.98 ± 1.06; Control: 50.69 ± 1.08 | To assess effects of Ziziphus jujube fruit (ZJF) infusion on lipid profiles, glycaemic control and antioxidant status in type 2 diabetes mellitus | Ziziphus jujube fruit (ZJF) infusion (10 g ZJF powder brewed in 100 mL boiling water for 10 minutes, not filtered); control group: balanced diet only (without ZJF) | 300 mL/day (100 mL three times/day before main meals: breakfast, lunch, dinner) | HbA1c, fasting blood glucose (FBS), 2h postprandial glucose (2hpp), total cholesterol (TC), triglycerides (TG), LDL-C, HDL-C, LDL/HDL ratio, TC/HDL ratio, total antioxidant capacity (TAC), malondialdehyde (MDA), BMI, blood pressure (SBP, DBP), dietary intake (energy, carbohydrate, protein, fat) | 12 weeks |
| Ahmad Zare Javid  (Iran, 2017) | Randomized parallel-group clinical trial | 32 | Range 35–67 years | To evaluate effect of cranberry juice enriched with omega-3 fatty acids adjunct with nonsurgical periodontal treatment on metabolic control and periodontal status in type 2 diabetes patients with periodontal disease | Cranberry juice (200 mL, twice daily); Omega-3 (1g capsule twice daily, containing 180mg EPA+120mg DHA); Cranberry juice enriched with omega-3 (200 mL containing 1g omega-3, twice daily); Control: nonsurgical periodontal treatment only | 400 mL/day (200 mL twice daily) for cranberry groups; omega-3 capsule: 2g/day (1g twice daily) | Fasting blood glucose (FBS), HbA1c, total cholesterol (TC), triglycerides (TG), HDL-C, LDL-C, probing depth (periodontal status), BMI, waist circumference, hip circumference, dietary intake (3-day 24h recalls) | 8 weeks |
| Akpene E. Banini  (USA, 2006) | Non-randomized controlled trial (T2D subjects assigned to groups; healthy controls included) | 29 | Control: 56±7.5; Control juice: 50±13;  Type 2 Diabetes (T2D) juice: 56±8; Type 2 Diabetes Dealcoholized Muscadine Grape Wine (T2D Dz-W): 60±12;  T2D wine: 60±15 | To evaluate effects of muscadine grape juice (MJ), muscadine grape wine (MW), and dealcoholized muscadine grape wine (Dz-W) on glycemic indices, blood constituents, lipid profile, anthropometrics, and nutrient intakes in healthy and T2D subjects | Muscadine grape juice (MJ; Duplin Winery, NC); Muscadine grape wine (MW; Duplin Winery, NC); Dealcoholized muscadine grape wine (Dz-W; prepared by reverse osmosis); Control: non-diabetic no supplement | 150 mL/day after dinner for 28 days | Fasting blood glucose, insulin, HbA1c, lipid profile (TC, TG, LDL, HDL), blood pressure (systolic/diastolic), BMI, waist circumference, erythrocyte membrane fatty acids (SAT, MUFA, PUFA), electrolytes (Na, K, Cl, Ca, Mg, P), liver function (ALT, AST, LDH, GGT, total protein, albumin, total bilirubin), kidney function, dietary intake | 28 days |
| Laleh Karimzadeh  (Iran, 2022) | Randomized, parallel-group, controlled, open-label trial | 38 | Beetroot Juice  (BJ): 54.08±9.23; Control: 53.89±8.78 | To investigate effects of concentrated beetroot juice (BJ) supplementation on anthropometric measures, glycemic control, blood pressure, and lipid profile in type 2 diabetes patients | Concentrated beetroot juice (BJ; Takdaneh, Inc., Iran); 24 mL concentrated BJ equivalent to 240 mL fresh beetroot juice (180 mg nitrate, 0.1 mg nitrite); Control: no intervention | 24 mL concentrated beetroot juice/day (in two doses between main meals) | Fasting plasma glucose (FPG), insulin, HbA1c, HOMA-IR, HOMA-β, total cholesterol, LDL, HDL, triglycerides, systolic BP, diastolic BP, plasma nitric oxide, BMI, waist circumference, hip circumference, WHR, physical activity (MET-min/week), dietary intake (24-h recalls) | 12 weeks |
| Joan I.A. Campbell-Tofte  (Denmark, 2011) | Randomized, double-blinded, placebo-controlled pilot clinical trial | 23 | 64±7 | To investigate the anti-diabetic efficacy of Rauvolfia-Citrus (RC) tea, as used in Nigerian traditional medicine, in type 2 diabetes patients | RC tea: decoction of Rauvolfia vomitoria foliage and Citrus aurantium fruits (400g:2kg per 10L water); Placebo: prepared similarly but without active ingredients (exact composition not specified in abstract/methods) | 750 mL/day (250 mL three times daily with main meals) | 2-h postprandial plasma glucose, fasting plasma glucose, HbA1c, serum insulin, C-peptide, cholesterol, triglycerides, skeletal muscle phosphorylated acetylCoA carboxylase, skeletal muscle fatty acids (SFA, MUFA, PUFA, triglyceride fractions, phospholipids), body weight, blood pressure (systolic/diastolic), liver function (ALT), electrolytes (Na, K), creatinine, C-reactive protein | 4 months (120 days) |
| Marjan Ajami  (Iran, 2020) | Double-blind randomized controlled trial | 34 | Stevia: 55.3±7.4; Sucralose: 52.1±7.6 | To investigate effects of stevia (natural sweetener) vs sucralose (artificial sweetener) as tea sweeteners on glycemic and lipid profile of type 2 diabetes patients | Stevia extract (2% in tea bag; 1 cup of stevia-sweetened tea at three meals); Sucralose (1 tablet of sucralose sweetener per cup of tea). Sweetened tea (200 mL black tea) provided to each participant daily for 8 weeks | 3 cups/day (200 mL each; total 600 mL/day of sweetened tea) with main meals | Fasting blood sugar (FBS), postprandial glucose (PPG), HbA1c, insulin, total cholesterol, LDL, HDL, triglycerides, BMI, waist circumference, blood pressure (systolic/diastolic), dietary intake (24-hour recalls) | 8 weeks |
| Jiajia Zhang  (China, 2022) | Randomized controlled trial | 56 | 65.48±5.61 | To discover whether exercise combined with TCM herbal tea intervention could produce a greater improvement in glucose metabolism than exercise alone in community patients with type 2 diabetes mellitus | TCM herbal tea formula (six substances: mulberry leaf, corn stigma, astragalus, Gynostemma pentaphyllum, medlar root bark, ophiopogon). Dose: 2g/day each (except ophiopogon 3g/day). Steep in ~500mL boiling water for 10 min, then soaked repeatedly; daily consumption ~1000-1500mL | 1000-1500 mL/day (recommended to take half hour or longer after meals, avoid drinking overnight) | HbA1c, fasting plasma glucose (FPG), glycated serum protein (GSP), lipid profile, physical fitness, exercise days/amount, adverse events | 12 weeks |
| Andrew O. Odegaard  (USA, 2026) | Randomized, two-arm, parallel trial (2-week run-in; 24-week intervention) | 178 | 60.1 ± 10.2 | To test effect of substituting plain water for habitual artificial sweetened beverage (ASB) intake on primary measures of diabetes control in people with type 2 diabetes | Artificial sweetened beverages (ASBs): commercial ASB of choice (caffeinated or not; 24 oz/day); Water: unflavored, sparkling or still, bottled or canned water of choice (24 oz/day) | 24 oz/day (≈710 mL/day; three 8-oz servings daily) | HbA1c, fructosamine, fasting glucose, fasting insulin, body weight, continuous glucose monitor metrics (time in range [TIR], time below range, time above range, mean glucose, glucose variability), medication effect score (MES) | 24 weeks (with assessments at baseline, 12 weeks, 24 weeks) |
| P.J. Hale  (UK, 1989) | Double-blind, randomized crossover trial | 12 | 60.5 ± 1.7 (SE); range 51-70 | To investigate clinical efficacy of Xiaoke tea (traditional Chinese herbal treatment for diabetes) on glycemic control in type 2 diabetes patients | Xiaoke tea (2.72g tea bag infused in 250mL freshly boiled water for 5 min, without sweetening); Ordinary tea (control; same preparation) | 2.72g tea bag, 4 times daily (with three main meals and at bedtime); actual compliance averaged 3.4±0.2 bags/day | HbA1c, basal serum glucose, post-breakfast serum glucose AUC, basal serum insulin, post-breakfast serum insulin AUC | 4 weeks per period (crossover; two consecutive 4-week periods) |
| Dan Ziegler  (Germany, 2015) | Randomized parallel-group pilot trial | 26 | High Fiber, Zero Red Meat, and High Coffee diet (HF2RM+C): 53.5±1.8;  Low Fiber, High Red Meat, Coffee Free diet (LF+RM2C): 53.7±2.6 | To determine whether low-energy diets differing in fiber, red meat, and coffee intake exert differential effects on cardiac autonomic function in obese individuals with type 2 diabetes | HF2RM+C diet: High in grain fiber (30–50 g/day, such as whole-grain bread), no red meat (poultry allowed), high in coffee (≥5 cups/day, 7–8 g of coffee grounds per cup). LF+RM2C diet: Low fiber (≤10 g/day whole grain fiber), high red meat (≥150 g/day beef), no coffee or tea. Both are low-calorie diets (median energy reduction of 1,198 kJ/day, macronutrient composition fixed at 50% carbohydrates, 30% fat, 20% protein). | HF2RM+C group: ≥5 cups/day (7–8 g of ground coffee per cup, approximately 50–60 g of coffee/day). LF+RM2C group: No coffee or tea | Cardiac autonomic function (HRV). Metabolic parameters: body weight, BMI, HbA1c, fasting blood glucose, fasting insulin, total cholesterol, branched-chain amino acids, IL-18, caffeine and its metabolites (theophylline, theobromine, xanthine), polyphenols (caffeic acid and its metabolites, etc.), urinary alkylresorcinol metabolites. Energy metabolism. Insulin sensitivity. | 8 weeks |

Table 2. Risk of Bias Assessment of Included Studies (Cochrane RoB 2 Tool)

|  | Study ID | D1 | D2 | D3 | D4 | D5 | Overall |
| --- | --- | --- | --- | --- | --- | --- | --- |
| **1** | **R. Marfella_2006** | 🟢 | 🔴 | 🟡 | 🔴 | 🟡 | 🟡 |
| **2** | **Anne E. Bantle_2008** | 🟢 | 🟢 | 🟡 | 🟢 | 🟡 | 🟡 |
| **3** | **Iris Shai_2007** | 🟢 | 🟡 | 🔴 | 🟢 | 🟡 | 🟡 |
| **4** | **Raffaele Napoli_2005** | 🔴 | 🔴 | 🟡 | 🟡 | 🟡 | 🔴 |
| **5** | **Fadia Mahmoud_2015** | 🟡 | 🟡 | 🟢 | 🟡 | 🔴 | 🟡 |
| **6** | **Tirang R. Neyestani_2010** | 🟡 | 🔴 | 🟢 | 🟡 | 🟡 | 🟡 |
| **7** | **M. Rafraf_2015** | 🟢 | 🟡 | 🟢 | 🟢 | 🟢 | 🟢 |
| **8** | **O.H. Ryu_2006** | 🟡 | 🟡 | 🟡 | 🟢 | 🔴 | 🟡 |
| **9** | **Gohar Sedaghat_2021** | 🟢 | 🟡 | 🟢 | 🟢 | 🟢 | 🟢 |
| **10** | **Sapna Sehgal_2026** | 🟡 | 🟡 | 🔴 | 🔴 | 🟡 | 🟡 |
| **11** | **Tomonori Nagao_2008** | 🟢 | 🟢 | 🟡 | 🟢 | 🟡 | 🟡 |
| **12** | **Mirzaei K_2009** | 🟢 | 🟢 | 🟡 | 🟢 | 🟡 | 🟡 |
| **13** | **Ameneh Madjd_2016** | 🟢 | 🟡 | 🟢 | 🟢 | 🟢 | 🟢 |
| **14** | **Zeinab Yazdanpanah_2017** | 🟢 | 🟡 | 🟢 | 🟢 | 🟢 | 🟢 |
| **15** | **Ahmad Zare Javid_2017** | 🟡 | 🟡 | 🟡 | 🟡 | 🔴 | 🔴 |
| **16** | **Akpene E. Banini_2006** | 🔴 | 🟡 | 🟡 | 🟢 | 🔴 | 🔴 |
| **17** | **Laleh karimzadeh_2023** | 🟢 | 🟡 | 🔴 | 🟢 | 🟢 | 🟡 |
| **18** | **Joan I.A. Campbell-Tofte_2010** | 🟢 | 🟢 | 🟡 | 🟢 | 🟢 | 🟢 |
| **19** | **Marjan Ajami_2020** | 🟡 | 🟢 | 🟡 | 🟢 | 🟢 | 🟢 |
| **20** | **Jiajia Zhang_2022** | 🟢 | 🟡 | 🔴 | 🟢 | 🟢 | 🟡 |
| **21** | **Andrew O. Odegaard_2026** | 🟢 | 🟢 | 🟢 | 🟢 | 🟢 | 🟢 |
| **22** | **P.J.Hale,P.M.Horrocks_1989** | 🟡 | 🟢 | 🟢 | 🟢 | 🟡 | 🟡 |
| **23** | **Dan Ziegler_2015** | 🟢 | 🟡 | 🔴 | 🟢 | 🟢 | 🟡 |

The methodological quality of each study was evaluated across five domains: randomization process (D1), deviations from intended interventions (D2), missing outcome data (D3), measurement of the outcome (D4), and selection of the reported result (D5). Each domain was rated as low risk of bias (🟢), some concerns (🟡), or high risk of bias (🔴). The overall risk of bias was determined according to the RoB 2 algorithm: a study was rated as low risk if all domains were low risk; some concerns if at least one domain had some concerns but no high-risk domains; and high risk if at least one domain was high risk or multiple domains had some concerns that substantially reduced confidence in the result.
